# Supplementary material
Source: publisher figshare collection journal article supplement (https://adisjournals.figshare.com/articles/dataset/_/6015755)

# Awareness, Knowledge & Perceptions of Biosimilars among Specialty Physicians

Awareness of biosimilars was high but **knowledge about the fundamentals of biosimilars was low** according to the results of a survey of 1,201 U.S. specialty physicians, created by the Biosimilars Forum and conducted by SERMO.

## KEY SURVEY FINDINGS

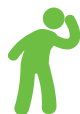

More than **three-quarters (77%) had heard** the term biosimilars in the week or month prior to being surveyed.

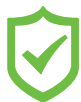

A little more than half of physicians surveyed know that in order to be approved, the FDA must find a biosimilar to be **equally effective (62%) and safe (57%)** when compared to the originator biologic.

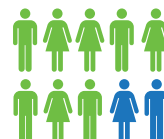

**Eight in ten (82%) believe** biosimilars will expand treatment options and provide savings to patients and the healthcare system.

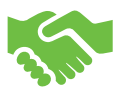

Most physicians surveyed do not clearly understand the concept of extrapolation as applied to biosimilars with **only 12% of survey respondents** stating that they trust extrapolation of the studied biosimilar indication(s) as the basis to obtain approval of other licensed indications of the originator.

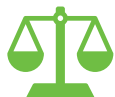

A little **more than half (nearly 60%) correctly understood** that to be approved as "interchangeable" a biosimilar must be shown to be safe and effective for back-and-forth switching with no negative impacts to safety or efficacy.

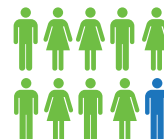

**Nine in ten (91%) would consider** switching a patient from an originator biologic to a biosimilar as an effective alternative to the originator if it would help the patient have better access to his/her medication, but **53% want more direct data** before switching.

## 5 MAJOR KNOWLEDGE GAPS IDENTIFIED

- Defining biosimilars & biosimilarity
- Understanding the pathway
- Understanding interchangeability
- Understanding extrapolation
- Appreciating the similar safety of biosimilars and their reference products

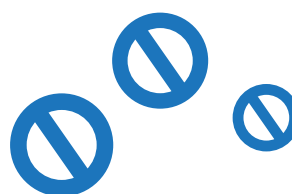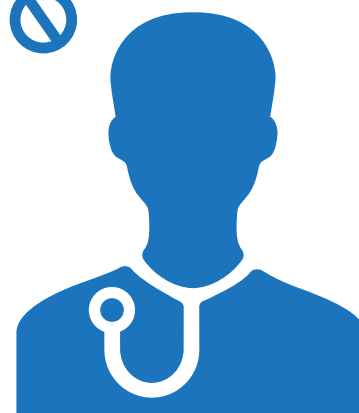

## About the Survey

19-question survey created by the Biosimilars Forum and conducted by SERMO, a global social network organization for physicians, from Nov. 20, 2015 to Jan. 4, 2016.

Responses were obtained from a total of 1,201 U.S. physicians across specialties that are high prescribers of biologics, including dermatologists, gastroenterologists, hematologist-oncologists, medical oncologists, nephrologists and rheumatologists.

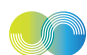

Supplement: Supplementary file 2 [file 1]
